# Supplementary material
Source: PubMed Central journal article supplement (PMC6413786)
Supplement: jciinsight-4-123971-s149.pdf [file jciinsight-4-123971-s149.pdf]

## Supplementary Materials

### Supplementary Table S1.

| Patient ID | Underlying disease | Type of LTx | Age, Sex | Rejection grade | Treatment                    | Complications                        | Time before retransplantation |
|------------|--------------------|-------------|----------|-----------------|------------------------------|--------------------------------------|-------------------------------|
| 126459     | PAH                | Heart-Lung  | 31, F    | BOS III         | Corticosteroids, Antibiotics | Aspergillus, Aureus                  | 1 year                        |
| 128308     |                    | Heart-Lung  | F        |                 |                              | 6 years                              |                               |
| 128720     | PAH, histiocytosis | SLTx        | 42, F    |                 |                              | Edema, Staphylococcus, CMV infection | 8 years                       |
| 129053     | PAH                |             | 41, F    |                 |                              | Infection                            | 2 years                       |
| 129654     | IPD                | DLTx        | 33, M    |                 |                              | Aspergillus, Fibrotic pneumopathy    | 7 years                       |

Characteristics of the OB/BOS explanted lungs from the retransplanted patients used in this study.

### List of supplementary figures.

Table S1. Characteristics of the OB/BOS explanted lungs from the retransplanted patients used in this study.

Supplementary Figure S2. Pathological changes of the bronchial epithelium in the mismatched lung grafts.

Supplementary Figure S3. Expression and distribution of the HLA-A2 transgene in untouched and transplanted mouse lungs.

Supplementary Figure S4. Qualitative assessment of plasma autoantibodies following LTx.

Supplementary Figure S5. B cells infiltrating the allografts are of recipient origin.

Supplementary Figure S6. Percentages of T helper and B effector responses in MLN from lung transplanted mice.

Supplementary Figure S7. Intracellular IFN $\gamma$  and IL17A in MLNs of lung transplanted rejecting mice.

Supplementary Figure S8. The formation of GCs in MLN is dependent on the HLA mismatch and on EBI2.

Supplementary Figure S9. *Ebi2* deficiency is associated with reduced B cell activation and follicle formation.
